# Supplementary material for: Arsenic Accumulation and Biotransformation Affected by Nutrients (N and P) in Common Blooming-Forming Microcystis wesenbergii (Komárek) Komárek ex Komárek (Cyanobacteria)
Source: MDPI journal article supplement (doi:10.3390/w14020245), 2022-01-15
Supplement: s1 [file s1]

Archive with 1 entries (1 files):
- water-1529287-SI.pdf
