# Supplementary material for: Arsenic Accumulation and Biotransformation Affected by Nutrients (N and P) in Common Blooming-Forming Microcystis wesenbergii (Komárek) Komárek ex Komárek (Cyanobacteria)
Source: MDPI journal article supplement (doi:10.3390/w14020245), 2022-01-15
Supplement: s1 [file s1 › water-1529287-SI.pdf]

Supplementary materials

# **Arsenic Accumulation and Biotransformation Affected by Nutrients (N and P) in Common Blooming-Forming *Microcystis wesenbergii* (Komárek) Komárek ex Komárek (Cyanobacteria)**

Zhe Xiao <sup>1,2</sup>, Xiaochuang Li <sup>2,\*</sup> and Shouliang Huo <sup>2</sup>

<sup>1</sup> School of Environmental and Chemical Engineering, Shanghai University, Shanghai 200444, China; xiaozhe2013520@163.com

<sup>2</sup> State Key Laboratory of Environmental Criteria and Risk Assessment, Chinese Research Academy of Environmental Sciences, Beijing 100012, China; huoshouliang@126.com

\* Correspondence: lilinostocacean@163.com; Tel: +86-027-68780067

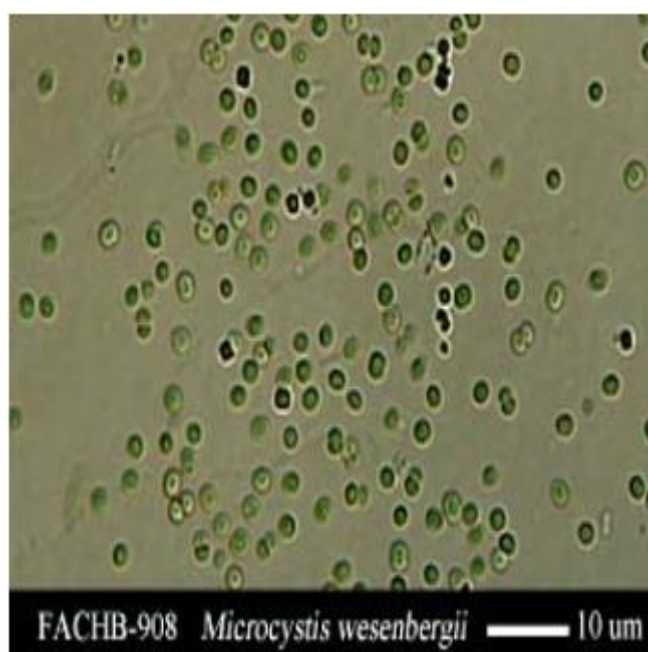

**Figure S1.** Photograph of *Microcystis wesenbergii* FACHB 908, provided from Institute of Hydrobiology, Chinese Academy of Sciences.

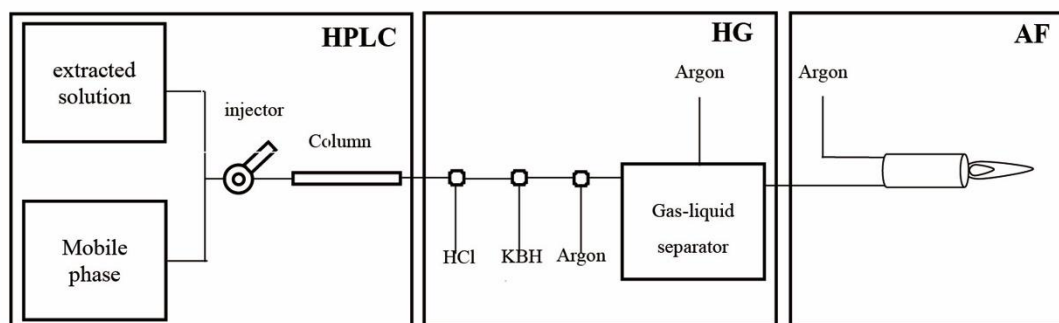

Figure S2. Instrumental scheme of coupled HPLC-HG-AFS.

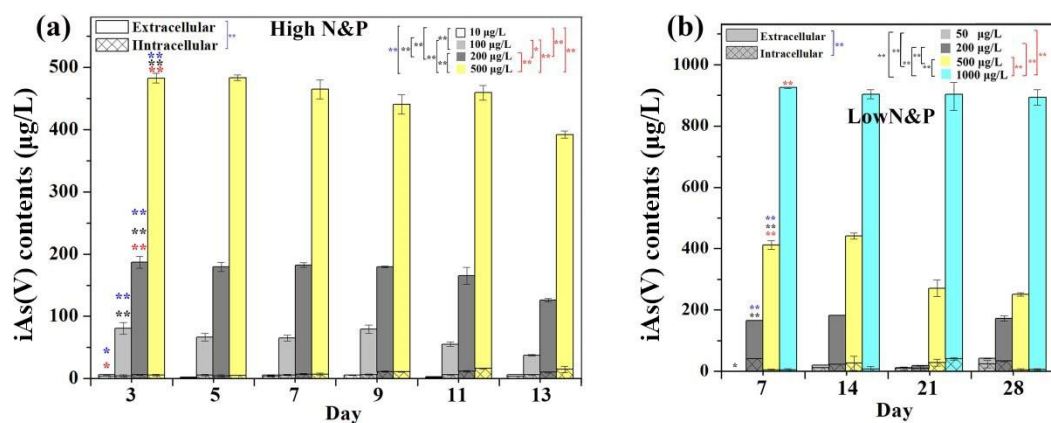

Figure S3. The intracellular and extracellular iAs(V) concentrations varied with incubation time that was exposed with different iAs(V) concentrations under the high (a) and low (b) nutrient sets. Note: Red and black \* on the legend indicated significant variations of intracellular and extracellular iAs(V) concentrations with incubation time, respectively, between each of two groups of ambient iAs(V) concentrations; blue \* indicated significant variations between intracellular and extracellular iAs(V) concentrations in four groups of ambient iAs(V) concentrations. Red, black, and blue \* on column bars indicated significant variations of intracellular, extracellular, and the total of iAs(V) concentrations with incubation time for each group of ambient iAs(V) concentration. Significance levels below 0.05 (\*) and 0.01 (\*\*) are denoted in the figure.

**Table S1.** Revised experimental condition for the HPLC-HG-AFS shown by Roldán et al. (2016).

|                             | HPLC                                                                                                                   | HG-AFS                            |                            |
|-----------------------------|------------------------------------------------------------------------------------------------------------------------|-----------------------------------|----------------------------|
| column                      | Hamilton PRPX-100<br>(250×4.1mm, particle size 10<br>µm)                                                               | Primary current<br>(mA)           | 27.5                       |
| Mobile phases A<br>(mmol/L) | (NH <sub>4</sub> )H <sub>2</sub> PO <sub>4</sub><br>2 mmol/L pH 4.6                                                    | Boosted (mA)                      | 35                         |
| Mobile phases<br>B(mmol/L)  | (NH <sub>4</sub> ) <sub>2</sub> HPO <sub>4</sub> /(NH <sub>4</sub> )H <sub>2</sub> PO <sub>4</sub><br>30 mmol/L pH 7.6 | HCl (v/v)                         | 5%                         |
| Gradient elution<br>program | A: 0–3 min                                                                                                             | Flow HCl (mL<br>min)              | 3.5                        |
|                             | B: 3–9 min                                                                                                             | KBH <sub>4</sub> (m/v)            | 1.5% (in 0.4% m/v<br>NaOH) |
|                             | A: 9–20 min                                                                                                            | Flow KBH <sub>4</sub><br>(mL/min) | 3.5                        |
| Flow rate (mL/min)          | 1.0                                                                                                                    | Argon flow<br>(mL/min)            | 300                        |
| Injection volume (µL)       | 250                                                                                                                    | nitrogen (mL/min)                 | 450                        |
